# Supplementary material for: ChlamyNET: a Chlamydomonas gene co-expression network reveals global properties of the transcriptome and the early setup of key co-expression patterns in the green lineage
Source: PubMed Central journal article supplement (PMC4788957; doi:10.1186/s12864-016-2564-y), 2016-03-12
Supplement: 12864_2016_2564_MOESM1_ESM.pdf [file 12864_2016_2564_MOESM1_ESM.pdf]

| Experiment                                                                                                                       | Condition                                                 | Sample    | Size  | Number of Reads | Read Length |
|----------------------------------------------------------------------------------------------------------------------------------|-----------------------------------------------------------|-----------|-------|-----------------|-------------|
| Analysis of the transcriptome from Fe-repleted, Fe-limited and Fe-deprived Chlamydomonas cells grown in TAP and minimal media    | WT strain 2137                                            | SRR402019 | 2.1   | 8.67            | 70          |
|                                                                                                                                  | Fe-repleted TAP                                           | SRR402020 | 2.2   | 9.38            | 70          |
|                                                                                                                                  | WT strain 2137                                            | SRR402021 | 2.3   | 9.85            | 70          |
|                                                                                                                                  | Fe-deficient TAP                                          | SRR402022 | 2.2   | 9.33            | 70          |
|                                                                                                                                  |                                                           | SRR402023 | 2.2   | 9.20            | 70          |
|                                                                                                                                  | WT strain 2137                                            | SRR402024 | 2.3   | 9.63            | 70          |
|                                                                                                                                  | Fe-limited TAP                                            | SRR402025 | 2.3   | 9.62            | 70          |
|                                                                                                                                  |                                                           | SRR402026 | 2.0   | 8.51            | 70          |
|                                                                                                                                  | WT strain 2137                                            | SRR402027 | 5.4   | 11.00           | 200         |
|                                                                                                                                  | Fe-repleted                                               | SRR402028 | 6.0   | 19.23           | 100         |
|                                                                                                                                  | Minimal Medium                                            | SRR402029 | 7.2   | 14.64           | 200         |
|                                                                                                                                  |                                                           | SRR402030 | 8.5   | 27.13           | 100         |
|                                                                                                                                  | WT strain 2137                                            | SRR402031 | 6.2   | 12.70           | 200         |
|                                                                                                                                  | Fe-deficient                                              | SRR402032 | 6.8   | 21.58           | 100         |
|                                                                                                                                  | Minimal Medium                                            | SRR402033 | 6.7   | 13.68           | 200         |
|                                                                                                                                  |                                                           | SRR402034 | 7.9   | 25.32           | 100         |
|                                                                                                                                  |                                                           | SRR402035 | 4.8   | 9.87            | 200         |
|                                                                                                                                  |                                                           | SRR402036 | 6.6   | 21.04           | 100         |
|                                                                                                                                  | SRR402037                                                 | 6.7       | 13.80 | 200             |             |
|                                                                                                                                  | SRR402038                                                 | 8.6       | 27.60 | 100             |             |
| Impact of oxidative stress on the transcriptome                                                                                  | WT strain 2137                                            | SRR394058 | 8.0   | 30.27           | 76          |
|                                                                                                                                  | t=0 of H <sub>2</sub> O <sub>2</sub> treatment            | SRR394059 | 39.48 | 21.04           | 76          |
|                                                                                                                                  | WT strain 2137                                            | SRR394060 | 8.8   | 33.03           | 76          |
|                                                                                                                                  | t=0.5 of H <sub>2</sub> O <sub>2</sub> treatment          | SRR394061 | 8.1   | 30.54           | 76          |
|                                                                                                                                  | WT strain 2137                                            | SRR394062 | 8.3   | 31.28           | 76          |
|                                                                                                                                  | SRR394063                                                 | 13.0      | 47.92 | 76              |             |
| Singlet oxygen acclimation                                                                                                       | WT strain 4A+                                             | SRR363977 | 0.91  | 5.4             | 36          |
|                                                                                                                                  |                                                           | SRR363978 | 0.93  | 5.26            | 36          |
| Different TAP recipes                                                                                                            | Recipe1                                                   | SRR074357 | 1.3   | 6.52            | 35          |
|                                                                                                                                  | Recipe2                                                   | SRR074358 | 1.4   | 7.00            | 35          |
| Analysis of the transcriptome from Cu-deficient and Cu-sufficient wild type and crr1 mutant cells grown in TAP and minimal media | WT strain 2137 Copper deficient cells grown in TAP medium | SRR096493 | 0.61  | 4.38            | 17          |
|                                                                                                                                  |                                                           | SRR096494 | 0.44  | 3.13            | 17          |
|                                                                                                                                  |                                                           | SRR096495 | 2.00  | 7.45            | 70          |
|                                                                                                                                  |                                                           | SRR096496 | 1.30  | 6.70            | 35          |
|                                                                                                                                  |                                                           | SRR096497 | 1.30  | 6.65            | 35          |
|                                                                                                                                  |                                                           | SRR096498 | 0.75  | 4.47            | 33          |
|                                                                                                                                  |                                                           | SRR096499 | 0.72  | 4.26            | 33          |
|                                                                                                                                  | WT strain 2137 Copper deficient cells grown in TAP medium | SRR096500 | 0.70  | 3.79            | 33          |
|                                                                                                                                  |                                                           | SRR096501 | 0.92  | 5.01            | 33          |
|                                                                                                                                  |                                                           | SRR096502 | 0.60  | 4.26            | 17          |
|                                                                                                                                  |                                                           | SRR096503 | 0.57  | 3.80            | 17          |
|                                                                                                                                  |                                                           | SRR096504 | 1.8   | 6.68            | 70          |
|                                                                                                                                  |                                                           | SRR096505 | 1.3   | 6.73            | 35          |
|                                                                                                                                  |                                                           | SRR096506 | 1.4   | 7.03            | 35          |
|                                                                                                                                  | Crr1:crr1 strain Cu-deficient                             | SRR096507 | 0.78  | 4.64            | 33          |
|                                                                                                                                  |                                                           | SRR096508 | 0.80  | 4.67            | 33          |
|                                                                                                                                  |                                                           | SRR096509 | 0.90  | 4.88            | 33          |
|                                                                                                                                  | Crr1:crr1 strain Cu-deficient                             | SRR096510 | 0.90  | 4.89            | 33          |
|                                                                                                                                  |                                                           | SRR096511 | 0.34  | 2.44            | 17          |
|                                                                                                                                  |                                                           | SRR096512 | 0.68  | 4.87            | 17          |
| WT strain 2137 Cu-deficient Min                                                                                                  | SRR096513                                                 | 1.50      | 7.43  | 35              |             |
|                                                                                                                                  | SRR096514                                                 | 1.40      | 6.83  | 35              |             |
|                                                                                                                                  | SRR096515                                                 | 1.3       | 6.66  | 35              |             |
| WT strain 2137 Cu-sufficient Min                                                                                                 | SRR096516                                                 | 1.4       | 7.13  | 35              |             |
|                                                                                                                                  | SRR096517                                                 | 3.4       | 11.49 | 100             |             |
|                                                                                                                                  | SRR096518                                                 | 3.9       | 13.26 | 100             |             |
| Global changes following N-deprivation                                                                                           | WT strain cw15 Nitrogen repletion                         | SRR096519 | 3.6   | 12.40           | 100         |
|                                                                                                                                  |                                                           | SRR096520 | 3.6   | 12.25           | 100         |
|                                                                                                                                  | WT strain cw15 Nitrogen deprivation                       | SRR066643 | 4.30  | 16.90           | 75          |
| Analysis of the transcriptome from S-deprived Chlamydomonas cells                                                                | WT strain D66 Sulfur repleted                             | SRR066644 | 4.70  | 18.30           | 75          |
|                                                                                                                                  |                                                           | SRR066645 | 4.50  | 17.81           | 75          |
|                                                                                                                                  |                                                           | SRR066646 | 4.50  | 17.66           | 75          |
|                                                                                                                                  |                                                           | SRR066647 | 4.60  | 17.87           | 75          |
|                                                                                                                                  | WT strain D66 Sulfur deprived                             | SRR066648 | 3.90  | 15.22           | 75          |
|                                                                                                                                  |                                                           | SRR039669 | 1.4   | 6.91            | 35          |
|                                                                                                                                  |                                                           | SRR039670 | 1.4   | 6.89            | 35          |
|                                                                                                                                  |                                                           | SRR039671 | 1.2   | 6.33            | 35          |
|                                                                                                                                  | ArsI1 mutant Sulfur repleted                              | SRR039672 | 1.2   | 5.91            | 35          |
|                                                                                                                                  |                                                           | SRR039673 | 1.3   | 6.74            | 35          |
|                                                                                                                                  |                                                           | SRR039674 | 1.2   | 6.10            | 35          |
|                                                                                                                                  |                                                           | SRR039675 | 1.4   | 7.22            | 35          |
|                                                                                                                                  |                                                           | SRR039676 | 0.77  | 4.22            | 33          |
| ArsI1 mutant Sulfur deprived                                                                                                     | SRR039677                                                 | 0.77      | 4.26  | 33              |             |
|                                                                                                                                  | SRR039678                                                 | 0.84      | 4.52  | 33              |             |
|                                                                                                                                  | SRR039679                                                 | 0.89      | 4.80  | 33              |             |
