# Supplementary material for: ChlamyNET: a Chlamydomonas gene co-expression network reveals global properties of the transcriptome and the early setup of key co-expression patterns in the green lineage
Source: PubMed Central journal article supplement (PMC4788957; doi:10.1186/s12864-016-2564-y), 2016-03-12
Supplement: 12864_2016_2564_MOESM6_ESM.pdf [file 12864_2016_2564_MOESM6_ESM.pdf]

| GO term    | Description                                    | p value | Representative Genes                                                                                                                                                      |
|------------|------------------------------------------------|---------|---------------------------------------------------------------------------------------------------------------------------------------------------------------------------|
| GO:0055085 | transmembrane transport                        | 9.8e-07 | Cre08.g367150 Cre10.g453400 Cre12.g502600<br>Cre10.g445850 g16355 Cre09.g396000<br>Cre01.g009400 Cre02.g108550 Cre13.g564650<br>Cre10.g445050 Cre10.g448450 Cre16.g648300 |
| GO:0006777 | Mo-molybdopterin cofactor biosynthetic process | 1.0e-06 | Cre13.g602900 Cre07.g322250<br>g9002 Cre06.g282150<br>Cre10.g451400                                                                                                       |
| GO:0005975 | carbohydrate metabolic process                 | 0.00299 | Cre10.g458350 Cre01.g032650 Cre08.g384750<br>Cre07.g336950 Cre12.g552200<br>Cre01.g053000 g3160                                                                           |
| GO:0006468 | protein phosphorylation                        | 0.01315 | Cre02.g108650 Cre03.g168150 Cre08.g378950<br>g2226 g5041 Cre02.g087900<br>Cre07.g347000 Cre09.g413400                                                                     |
